# Supplementary material
Source: Springer Nature journal article supplement (https://www.springermedizin.de/resource/supplementary/12950_2012_280_MOESM1_ESM.pdf/9557466)
Supplement: MOESM1 [file 9557466]

Screening with key words – 3835 studies

Studies excluded after screening for non-English, pediatric, non-human, review, meta-analysis, case series studies, clinical guidelines articles, and editorials. (2625 studies)

Applied for detailed evaluation – 1210 studies

Studies found unrelevant after screening for title and abstract. (1145 studies)

Evaluation of full text studies – 65 studies

Studies excluded after screening full text for serum levels of selected inflammatory marker before and after CPAP treatment. (42 studies)

Studies to be included in the meta-analysis – 23 studies
